# Supplementary material for: Proteinase-activated receptor 2 modulates OA-related pain, cartilage and bone pathology
Source: HighWire-hosted journal article supplement (doi:10.1136/annrheumdis-2015-208268), 2015-12-24
Supplement: annrheumdis-2015-208268supp_table.pdf [file annrheumdis-2015-208268supp_table.pdf]

**Supplemental Table 1. Synovitis Scoring**

| Score              | Pannus                                                                                                                                        | Synovial membrane thickening                                                                          | Sub-synovial infiltration                                                                                                                         |
|--------------------|-----------------------------------------------------------------------------------------------------------------------------------------------|-------------------------------------------------------------------------------------------------------|---------------------------------------------------------------------------------------------------------------------------------------------------|
| <b>Description</b> | Defined as fibrous tissue/synovium/ inflammatory cell outgrowth spreading over the surface of the bone and/or cartilage at the joint margins. | Scored superior to the meniscal remnant. Score the maximum hyperplasia seen anywhere along this area. | Scored superior to the meniscal remnant.                                                                                                          |
| <b>0</b>           | No Pannus                                                                                                                                     | 1 cell thick                                                                                          | No infiltrating cells                                                                                                                             |
| <b>1</b>           | Mild: Pannus has migrated on bone but not encroaching on cartilage.                                                                           | Mild: 2-3 cells thick                                                                                 | Occasional scattered infiltrating cells or perivascular accumulations.                                                                            |
| <b>2</b>           | Moderate: Pannus has migrated < 1x cartilage depth.                                                                                           | Moderate: 4-5 cells thick                                                                             | Focal areas of dense sub-synovial infiltrate, but still predominantly normal sub-synovial areolar connective tissue present.                      |
| <b>3</b>           | Severe: Pannus has migrated > 1x cartilage depth.                                                                                             | Severe: > 6 cells thick                                                                               | Widespread dense sub-synovial infiltrate – markedly reduced or little/no normal areolar connective tissue evident or lymphoid follicle formation. |

(Modified from Jackson *et al*<sup>6</sup>)
